# Supplementary material for: Family-wide analysis of human macrodomains reveals novel activities and identifies PARG as most efficient ADPr-RNA hydrolase
Source: Springer Nature journal article supplement (doi:10.1038/s42003-025-07901-7), 2025-03-18
Supplement: MOESM1 [file 42003_2025_7901_MOESM1_ESM.pdf]

## Supplementary Figure 1

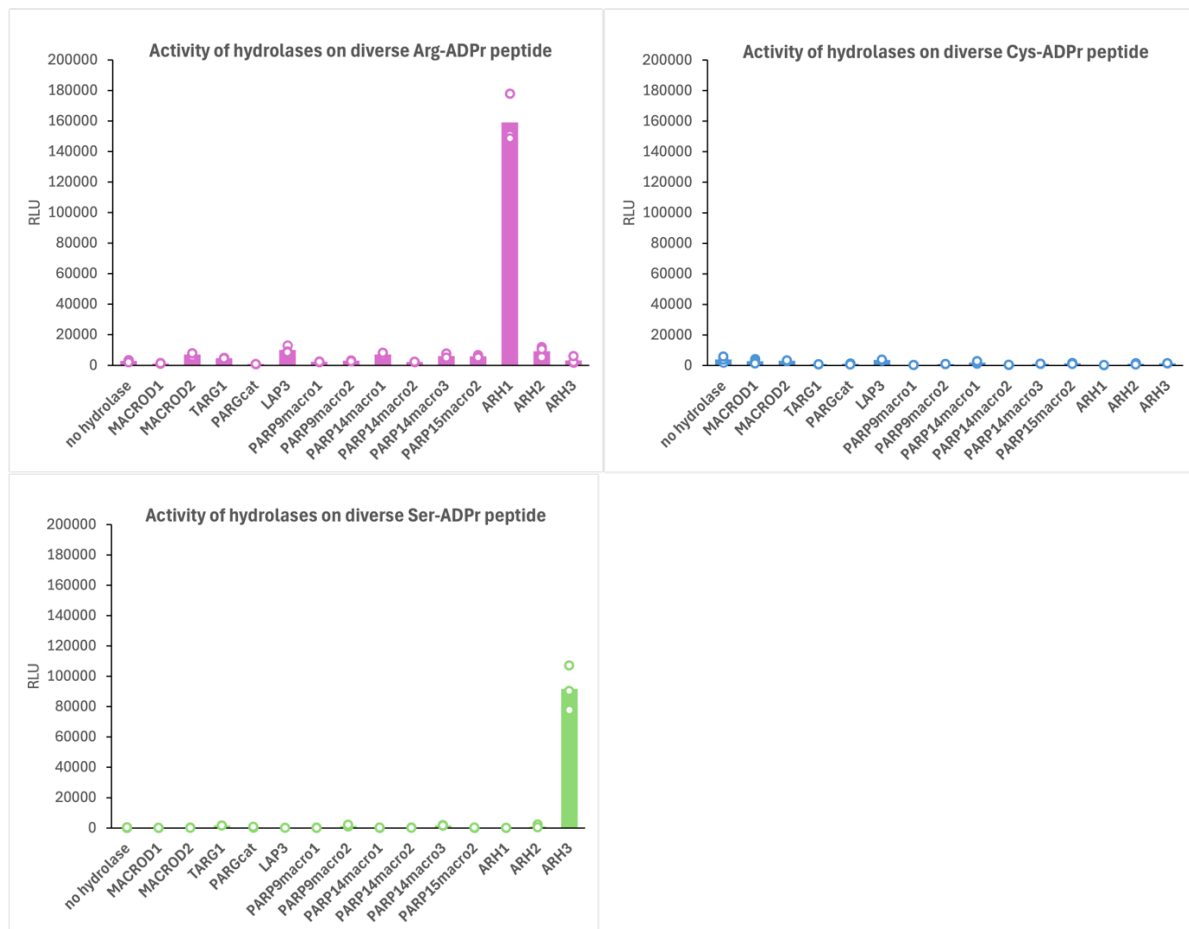

**Supplementary Figure 1. AMP-Glo assay on serine-, arginine- and cysteine-ADPr peptides.** An AMP-Glo assay was performed using specific ADPr-peptides, which were incubated with 1 $\mu$ M of the indicated hydrolases and NUDT5.
